# Supplementary material for: Preconditioning of the immune system modulates the response of papillary thyroid cancer to immune checkpoint inhibitors
Source: PubMed Central journal article supplement — J Immunother Cancer. 2022 Dec 15;10(12):e005538. doi: 10.1136/jitc-2022-005538 (PMC9756278; doi:10.1136/jitc-2022-005538), 2022-12-15
Supplement: jitc-2022-005538supp001.pdf [file jitc-2022-005538supp001.pdf]

## Concomitant IET

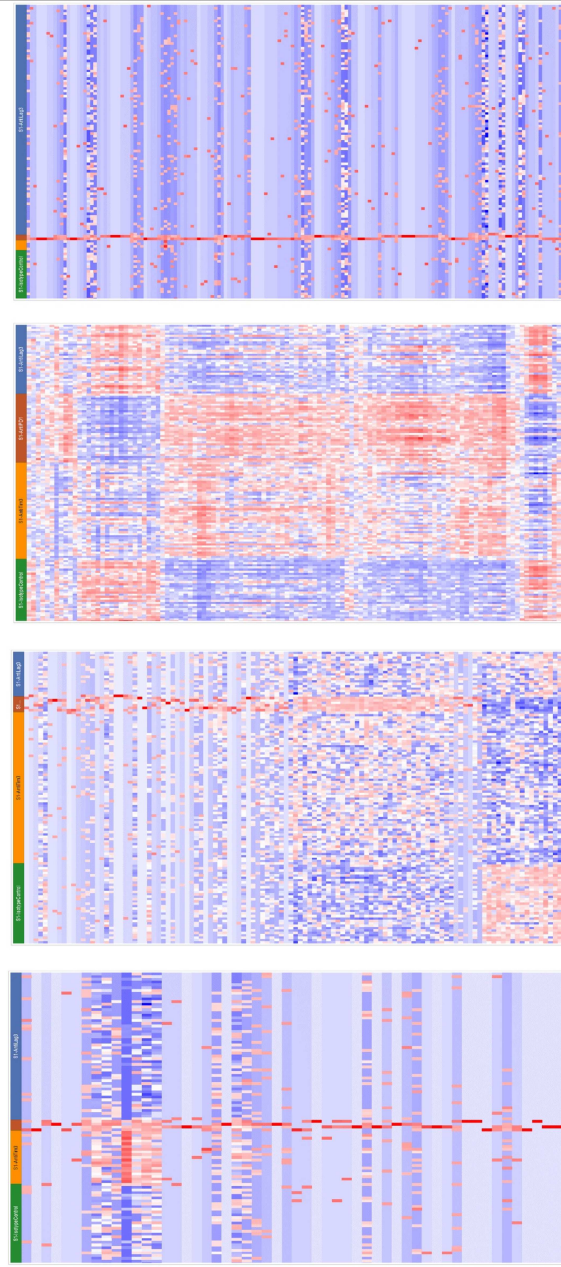

T cells

Neutrophils

Macrophages

B cells

Control TIM-3 PD-1 LAG-3

## Pre-existing IET

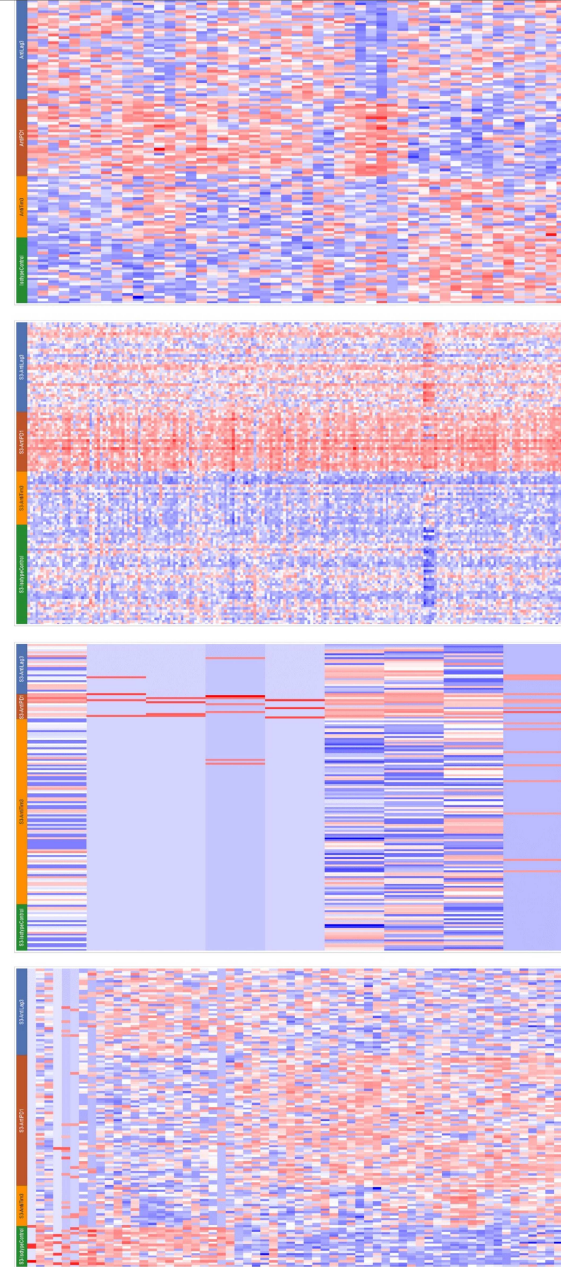

T cells

Neutrophils

Macrophages

B cells
