# Supplementary material for: Preconditioning of the immune system modulates the response of papillary thyroid cancer to immune checkpoint inhibitors
Source: PubMed Central journal article supplement — J Immunother Cancer. 2022 Dec 15;10(12):e005538. doi: 10.1136/jitc-2022-005538 (PMC9756278; doi:10.1136/jitc-2022-005538), 2022-12-15
Supplement: jitc-2022-005538supp003.pdf [file jitc-2022-005538supp003.pdf]

**Supplementary Table 1.** Immune checkpoint inhibitor (ICI) antibodies used in this study

| <b>Target</b> | <b>Fluorochrome</b> | <b>Isotype</b> | <b>Clone</b> | <b>Company</b> | <b>Catalog number</b> |
|---------------|---------------------|----------------|--------------|----------------|-----------------------|
| PD-1          | CD279               | IgG2a, k       | RMP1-14      | BioXCell       | BE0146                |
| TIM-3         | CD366               | IgG1, k        | B8.2C12      | BioXCell       | BE0275                |
| LAG-3         | CD223               | IgG1, k        | C987W        | BioXCell       | BE174                 |
| Isotype       | IgG1                | Mouse IgG, k   | MOPC-21      | BioXCell       | BE0083                |
